# Supplementary material for: 4-Acetyl-Antroquinonol B Suppresses SOD2-Enhanced Cancer Stem Cell-Like Phenotypes and Chemoresistance of Colorectal Cancer Cells by Inducing hsa-miR-324 re-Expression
Source: PubMed Central journal article supplement (PMC6116152; doi:10.3390/cancers10080269), 2018-08-10

# 4-Acetyl-Antroquinonol B Suppresses SOD2-Enhanced Cancer Stem Cell-Like Phenotypes and Chemoresistance of Colorectal Cancer Cells by Inducing hsa-miR-324 re-Expression

Oluwaseun Adebayo Bamodu <sup>1,2,†</sup> Ching-Kuo Yang <sup>3,†</sup>, David T.W. Tzeng <sup>4</sup>, Kuang-Tai Kuo <sup>5,6</sup>, Chun-Chih Huang <sup>7</sup>, Li Deng <sup>8,9</sup>, Michael Hsiao <sup>10</sup>, Wei-Hwa Lee <sup>11,12,\*</sup> and Chi-Tai Yeh <sup>1,2,\*</sup>

**Figure S1.** Bioinformatics-based systemic pharmacocoanalyses reveal health effects of 4-AAQB. Predicted values of the health benefits of 4-AAQB are shown in several human systems, with the highest (~99%) health effects in the gastrointestinal system, which includes the colon and rectum, using the ACD/Labs 2.0 v5.0.0.184 platform.

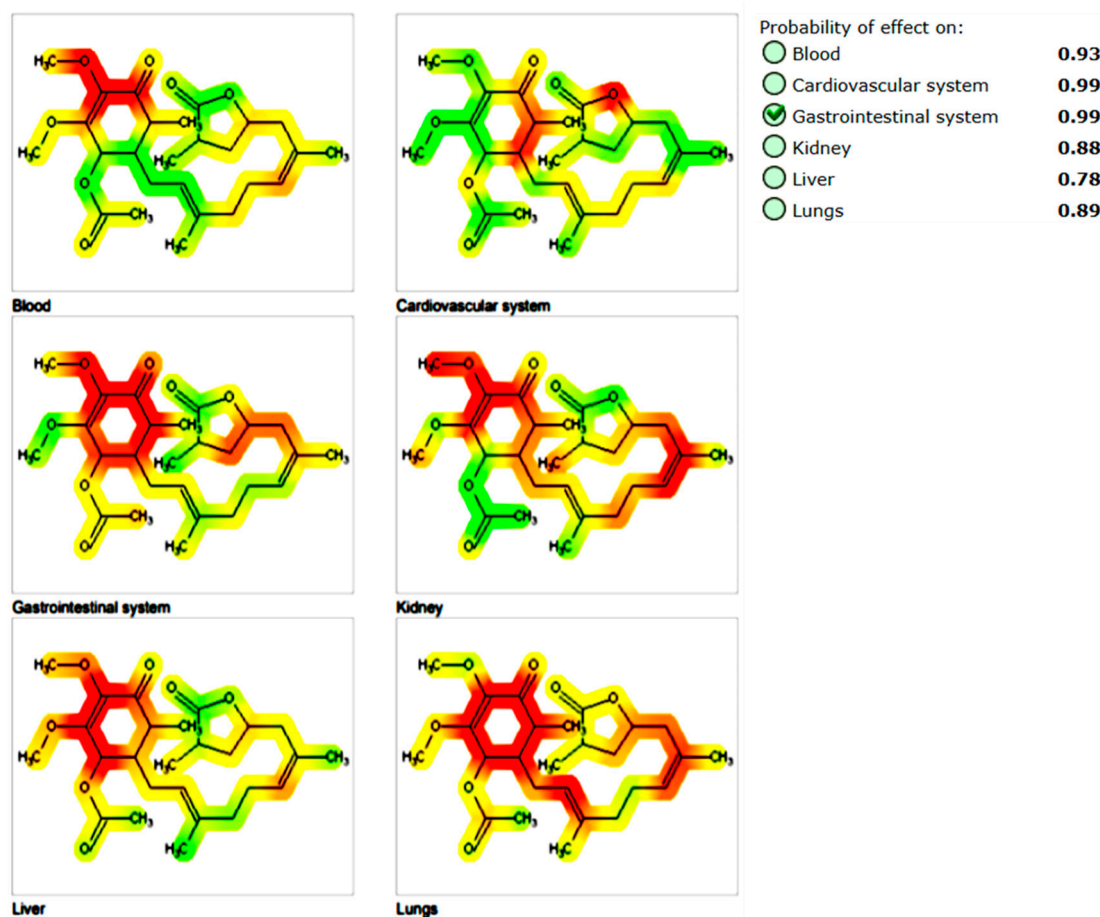

**Figure S2.** 4-AAQB dose determination and ADMET analyses for in vivo assays. **(A)** Bioinformatic computation of the physicochemical descriptors and prediction of ADME parameters, pharmacokinetic properties, drug-like nature and medicinal chemistry friendliness of 4-AAQB using the SwissADME platform. **(B)** Data showing the results of in silico drug safety/toxicity analysis on the pkCSM platform. Charts showing **(C)** the administration route and bioinformatics-based predicted lethality dose, LD in different species, and **(D)** Predicted values for oral acute toxicity hazard categories, OECD ranges, using the ACD/Labs 2.0 v5.0.0.184. ADMET: absorption, distribution, metabolism, excretion, and toxicity; OECD: Organisation for Economic Cooperation and Development; Cat.: category.

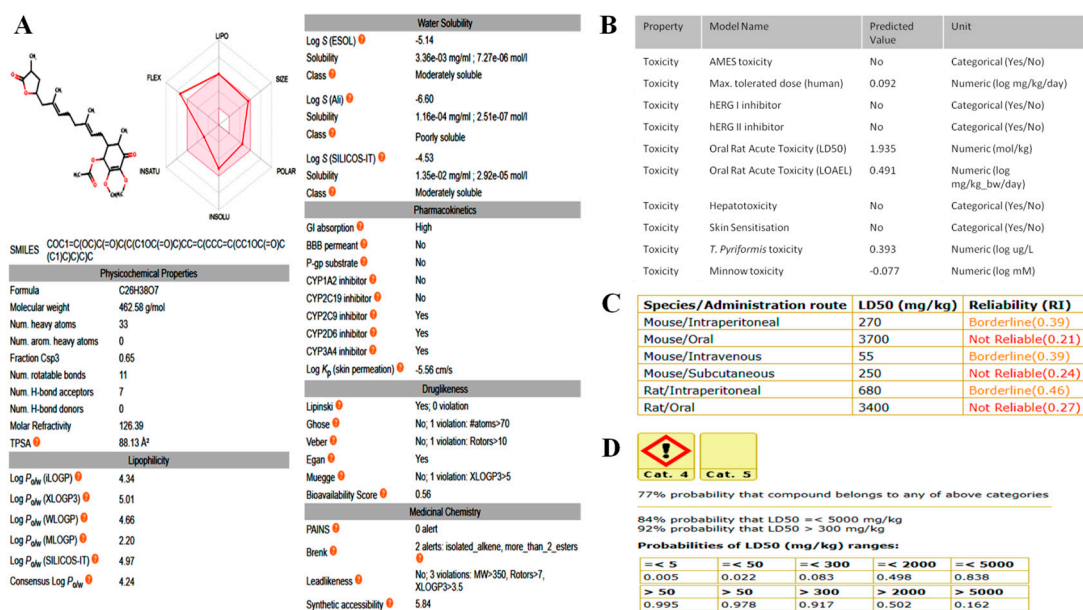

Supplement: cancers-10-00269-s001.pdf [file cancers-10-00269-s001.pdf]
